# Supplementary material for: Temporal Trends in Care and Outcomes of Patients Receiving Fibrinolytic Therapy Compared to Primary Percutaneous Coronary Intervention: Insights From the Get With The Guidelines Coronary Artery Disease (GWTG‐CAD) Registry
Source: PubMed Central journal article supplement — J Am Heart Assoc. 2016 Oct 6;5(10):e004113. doi: 10.1161/JAHA.116.004113 (PMC5121508; doi:10.1161/jaha.116.004113), 2016-10-06
Supplement: JAH3-5-e004113-s001.pdf [file JAH3-5-e004113-s001.pdf]

# **SUPPLEMENTAL MATERIAL**

**Table S1.** Predictors of fibrinolytic use vs PPCI.

| Variable                                                | Level                                 | OR (95% CI)      | P-value |
|---------------------------------------------------------|---------------------------------------|------------------|---------|
| Admission year (ref. 2003)                              | 2004                                  | 0.61 (0.51-0.73) | <0.0001 |
|                                                         | 2005                                  | 0.36 (0.28-0.47) |         |
|                                                         | 2006                                  | 0.29 (0.21-0.38) |         |
|                                                         | 2007                                  | 0.16 (0.11-0.23) |         |
|                                                         | 2008                                  | 0.16 (0.10-0.25) |         |
| Age (per 5 years)                                       |                                       | 0.99 (0.96-1.02) | 0.41    |
| Sex (ref. Male)                                         | Female                                | 1.05 (0.95-1.16) | 0.36    |
| Race (ref. Caucasian)                                   | non-Caucasian                         | 1.03 (0.92-1.17) | 0.59    |
| Hour of arrival<br>(ref. off hours weekends and nights) | Regular hours<br>(weekdays 7am - 7pm) | 0.70 (0.63-0.77) | <0.0001 |
| Insurance (ref. other)                                  | Medicaid                              | 0.97 (0.79-1.20) | 0.67    |
|                                                         | Medicare                              | 1.08 (0.92-1.26) |         |
|                                                         | No Insurance/Not Documented/UT        | 1.06 (0.92-1.22) |         |
| <b>Past Medical/Surgical history</b>                    |                                       |                  |         |
| CABG                                                    | Yes                                   | 1.47 (0.95-2.28) | 0.08    |
| CAD                                                     | Yes                                   | 1.17 (0.93-1.46) | 0.17    |
| Diabetes                                                | Yes                                   | 1.08 (0.97-1.20) | 0.18    |
| Heart failure                                           | Yes                                   | 1.05 (0.80-1.38) | 0.73    |
| Hyperlipidemia                                          | Yes                                   | 0.88 (0.80-0.97) | 0.009   |
| Hypertension                                            | Yes                                   | 1.01 (0.92-1.10) | 0.84    |
| MI                                                      | Yes                                   | 1.02 (0.90-1.16) | 0.75    |
| PCI                                                     | Yes                                   | 1.07 (0.63-1.81) | 0.78    |
| Smoking                                                 | Yes                                   | 1.10 (1.00-1.20) | 0.04    |
| Number of beds (per 50 beds)                            |                                       | 1.03 (0.99-1.08) | 0.17    |

|                          |     |                  |      |
|--------------------------|-----|------------------|------|
| CABG/CT capable hospital | Yes | 1.90 (0.81-4.45) | 0.14 |
| Rural location           | Yes | 2.51 (1.04-6.07) | 0.04 |

PPCI – Primary percutaneous coronary intervention, OR – odds ratio, CI – Confidence interval,

CABG - Coronary artery bypass graft, CAD – Coronary artery disease, MI - myocardial

infarction, PCI - percutaneous coronary intervention, CT – Cardiothoracic.

**Table S2.** Predictors of delayed fibrinolysis (DTN > 30 minutes) vs timely fibrinolysis (DTN ≤ 30 minutes).

| Variable                                                       | Level                              | OR (95% CI)      | P-value |
|----------------------------------------------------------------|------------------------------------|------------------|---------|
| Admission year (ref. 2003)                                     | 2004                               | 0.95 (0.70-1.30) | 0.02    |
|                                                                | 2005                               | 1.15 (0.75-1.76) |         |
|                                                                | 2006                               | 0.78 (0.49-1.25) |         |
|                                                                | 2007                               | 1.38 (0.84-2.28) |         |
|                                                                | 2008                               | 2.31 (1.08-4.93) |         |
| Age (per 5 years)                                              |                                    | 1.01 (0.96-1.07) | 0.67    |
| Sex (ref. Male)                                                | Female                             | 1.05 (0.83-1.33) | 0.67    |
| Race (ref. Caucasian)                                          | non-Caucasian                      | 0.92 (0.70-1.21) | 0.56    |
| Hour of arrival (ref. off hours (weekends and nights 7pm-7am)) | Regular hours (weekdays 7am - 7pm) | 0.97 (0.78-1.21) | 0.81    |
| Insurance (ref. other)                                         | Medicaid                           | 0.80 (0.54-1.20) | 0.15    |
|                                                                | Medicare                           | 1.27 (0.91-1.77) |         |
|                                                                | No Insurance/Not Documented/UT     | 1.05 (0.77-1.42) |         |
| <b>Past Medical/Surgical history</b>                           |                                    |                  |         |
| CAD                                                            | Yes                                | 1.14 (0.77-1.71) | 0.51    |
| COPD                                                           | Yes                                | 1.29 (0.93-1.80) | 0.12    |
| Diabetes                                                       | Yes                                | 1.27 (1.02-1.57) | 0.03    |
| Heart failure                                                  | Yes                                | 1.48 (1.03-2.13) | 0.04    |
| Hyperlipidemia                                                 | Yes                                | 1.04 (0.83-1.31) | 0.73    |
| Hypertension                                                   | Yes                                | 1.10 (0.88-1.37) | 0.41    |
| MI                                                             | Yes                                | 0.94 (0.72-1.23) | 0.66    |
| PCI                                                            | Yes                                | 0.57 (0.23-1.41) | 0.22    |
| Smoking                                                        | Yes                                | 0.91 (0.73-1.12) | 0.36    |

|                                         |     |                  |      |
|-----------------------------------------|-----|------------------|------|
| Number of beds $\leq$ 600 (per 50 beds) |     | 0.98 (0.92-1.04) | 0.46 |
| Number of beds > 600 (per 50 beds)      |     | 1.07 (1.00-1.14) | 0.04 |
| CABG/CT capable hospital                | Yes | 1.03 (0.60-1.76) | 0.91 |
| Rural location                          | Yes | 1.19 (0.57-2.49) | 0.65 |

PPCI – Primary percutaneous coronary intervention, DTN- Door to needle, DTB – Door to balloon, OR – odds ratio, CI – Confidence interval, CAD – Coronary artery disease, COPD – chronic obstructive pulmonary disease, MI - myocardial infarction, PCI - percutaneous coronary intervention, CABG - Coronary artery bypass graft, CT – Cardiothoracic.

**Table S3.** Predictors of delayed PPCI (DTB > 90 minutes) vs timely PPCI (DTB ≤ 90 minutes).

| Variable                                                       | Level                              | OR (95% CI)      | P value |
|----------------------------------------------------------------|------------------------------------|------------------|---------|
| Admission year (ref. 2003)                                     | 2004                               | 1.03 (0.79-1.34) | <0.0001 |
|                                                                | 2005                               | 0.84 (0.62-1.14) |         |
|                                                                | 2006                               | 0.58 (0.43-0.79) |         |
|                                                                | 2007                               | 0.33 (0.23-0.46) |         |
|                                                                | 2008                               | 0.21 (0.15-0.29) |         |
| Age ≤ 53 (per 5 years)                                         |                                    | 0.94 (0.89-0.99) | 0.01    |
| Age > 53 (per 5 years)                                         |                                    | 1.08 (1.05-1.10) | <0.0001 |
| Sex (ref. Male)                                                | Female                             | 1.08 (0.98-1.20) | 0.11    |
| Hour of arrival (ref. off hours (weekends and nights 7pm-7am)) | Regular hours (weekdays 7am - 7pm) | 0.45 (0.40-0.51) | <.0001  |
| Insurance (ref. other)                                         | Medicaid                           | 1.08 (0.88-1.31) | 0.65    |
|                                                                | Medicare                           | 0.96 (0.88-1.05) |         |
|                                                                | No Insurance/Not Documented/UT     | 1.02 (0.91-1.15) |         |
| <b>Past Medical/Surgical history</b>                           |                                    |                  |         |
| CAD                                                            | Yes                                | 1.01 (0.86-1.19) | 0.90    |
| Diabetes                                                       | Yes                                | 1.18 (1.08-1.28) | .0002   |
| Dialysis                                                       | Yes                                | 1.35 (0.69-2.63) | 0.33    |
| Heart failure                                                  | Yes                                | 1.19 (1.00-1.43) | 0.06    |
| Hyperlipidemia                                                 | Yes                                | 1.04 (0.96-1.12) | 0.37    |
| Hypertension                                                   | Yes                                | 1.11 (1.02-1.20) | 0.01    |
| MI                                                             | Yes                                | 1.15 (1.03-1.30) | 0.02    |
| Renal insufficiency                                            | Yes                                | 1.33 (1.06-1.68) | 0.01    |
| Smoking                                                        | Yes                                | 0.86 (0.78-0.94) | 0.001   |
| Valvular heart disease                                         | Yes                                | 0.77 (0.24-2.50) | 0.62    |
| Number of beds ≤ 400 (per 50 beds)                             |                                    | 1.09 (1.00-1.19) | 0.05    |

|                                    |               |                  |      |
|------------------------------------|---------------|------------------|------|
| Number of beds > 400 (per 50 beds) |               | 1.01 (0.98-1.04) | 0.60 |
| Race (ref. Caucasian)              | non-Caucasian | 1.10 (0.98-1.23) | 0.10 |
| CABG/CT capable hospital           | Yes           | 0.60 (0.38-0.95) | 0.03 |
| Rural location                     | Yes           | 1.77 (1.09-2.87) | 0.02 |

PPCI – Primary percutaneous coronary intervention, DTB – Door to balloon, OR – odds ratio, CI – Confidence interval, CAD – Coronary artery disease, MI - myocardial infarction, CABG - Coronary artery bypass graft, CT – Cardiothoracic.
